# Supplementary material for: Highly stable and efficient cathode-buffer-layer-free inverted perovskite solar cells
Source: Royal Society of Chemistry journal article supplement (doi:10.1039/d1nr00839k), 2021-01-01
Supplement: d1nr00839k1.pdf [file d1nr00839k1.pdf]

Supporting Information

**Highly stable and efficient cathode-buffer-layer-free inverted perovskite solar cells**

Yong Ryun Kim<sup>a</sup>, Chang Mok Oh<sup>b</sup>, Chang Jae Yoon<sup>a</sup>, Ju-Hyeon Kim<sup>c</sup>, Kiyoung Park<sup>c</sup>,  
Kwanghee Lee<sup>a,c\*</sup>, In-Wook Hwang<sup>b\*</sup>, Heejoo Kim<sup>d\*</sup>

<sup>a</sup>*Research Institute for Solar and Sustainable Energies (RISE), Gwangju Institute of Science and Technology (GIST), Gwangju 61005, Republic of Korea*

<sup>b</sup>*Advanced Photonics Research Institute (APRI), Gwangju Institute of Science and Technology, Gwangju 61005, Republic of Korea*

<sup>c</sup>*Heeger Center for Advanced Materials (HCAM), Gwangju Institute of Science and Technology (GIST), Gwangju 61005, Republic of Korea*

<sup>d</sup>*Graduate School of Energy Convergence, Institute of Integrated Technology, Gwangju Institute of Science and Technology (GIST), Gwangju 61005, Republic of Korea*

---

**Corresponding Author**

\* E-mail: [klee@gist.ac.kr](mailto:klee@gist.ac.kr) (Kwanghee Lee), [hwangiw@gist.ac.kr](mailto:hwangiw@gist.ac.kr) (In-wook Hwang),  
[Heejook@gist.ac.kr](mailto:Heejook@gist.ac.kr) (Heejoo Kim),

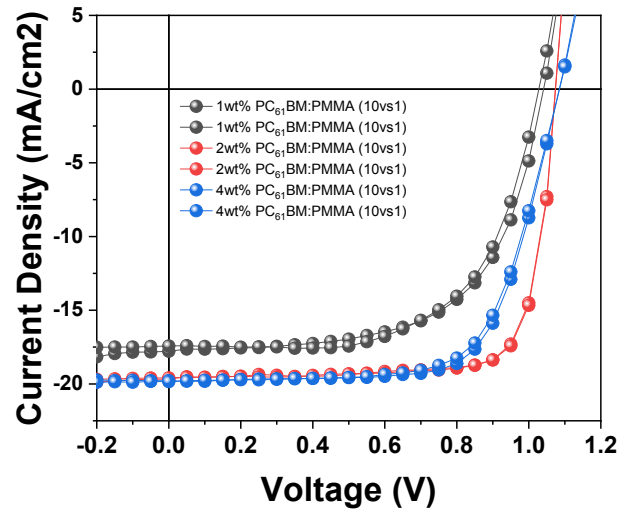

**Fig S1.** – The  $J$ - $V$  of the I-PeSCs fabricated using various wt.% PC<sub>61</sub>BM dispersed in 1wt% of PMMA (the volume ratio 10 vs 1); Device structures of ITO/PTAA/PFN-Br/MAPbI<sub>3</sub>/PC<sub>61</sub>BM:PMMA/Cu were used

**Table S1.** – Photovoltaic device parameters for I-PeSCs fabricated using the device structures of ITO/PTAA/PFN-Br/MAPbI<sub>3</sub>/PC<sub>61</sub>BM/Cu and ITO/PTAA/PFN-Br/MAPbI<sub>3</sub>/PC<sub>61</sub>BM:PMMA/Cu

| ETLs                                   | Spin-coating speed (rpm) | Sweep Direction | V <sub>oc</sub> (V) | J <sub>sc</sub> (mA/cm <sup>2</sup> ) | FF   | PCE (%) |
|----------------------------------------|--------------------------|-----------------|---------------------|---------------------------------------|------|---------|
| PC <sub>61</sub> BM (1wt%):PMMA (1wt%) | 2000                     | Forward         | 1.04                | 17.78                                 | 0.62 | 11.42   |
|                                        |                          | Reverse         | 1.03                | 17.42                                 | 0.63 | 11.24   |
| PC <sub>61</sub> BM (2wt%):PMMA (1wt%) | 2000                     | Forward         | 1.07                | 19.67                                 | 0.78 | 16.53   |
|                                        |                          | Reverse         | 1.07                | 19.59                                 | 0.79 | 16.55   |
| PC <sub>61</sub> BM (4wt%):PMMA (1wt%) | 2000                     | Forward         | 1.06                | 19.86                                 | 0.72 | 15.19   |
|                                        |                          | Reverse         | 1.06                | 19.88                                 | 0.74 | 15.61   |

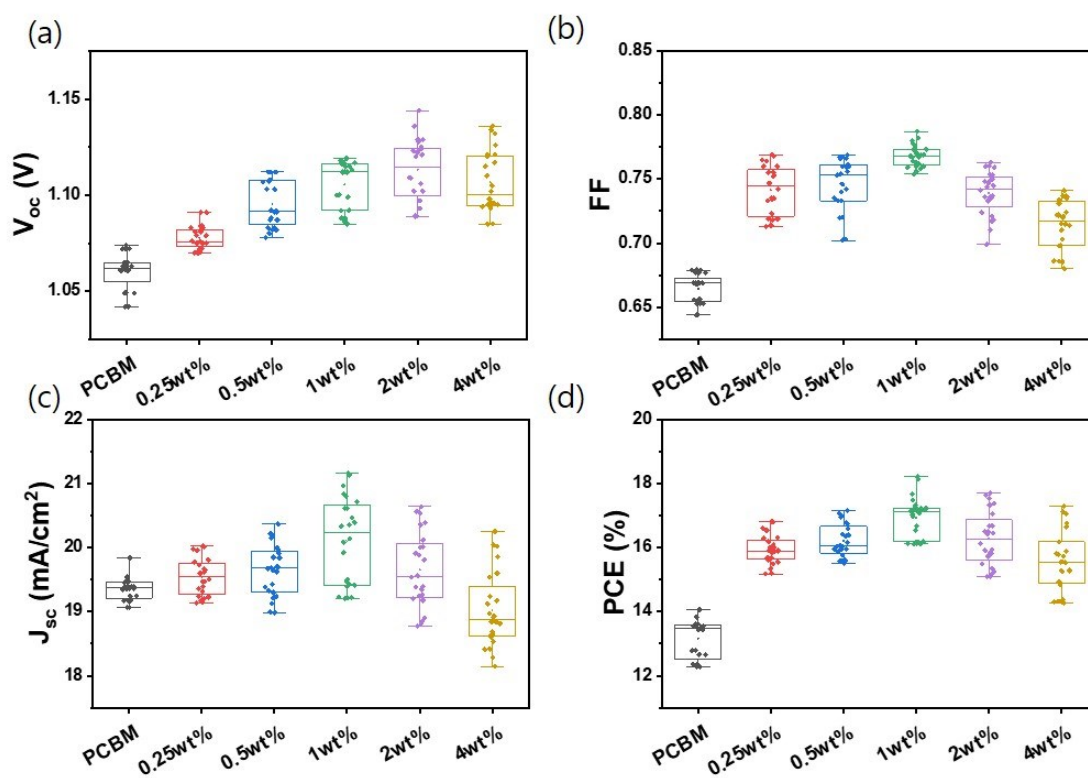

**Fig S2.** – Statistical distribution of the device parameters for I-PeSCs fabricated using various wt.% PMMA in PC<sub>61</sub>BM; (a)  $V_{oc}$ , (b) FF, (c)  $J_{sc}$ , and (d) PCE. Device structures of ITO/PTAA/PFN-Br/MAPbI<sub>3</sub>/PC<sub>61</sub>BM and ITO/PTAA/PFN-Br/MAPbI<sub>3</sub>/PC<sub>61</sub>BM:PMMA/Cu were used

**Table S2.** – Photovoltaic device parameters for I-PeSCs fabricated using the device structures of ITO/PTAA/PFN-Br/MAPbI<sub>3</sub>/PC<sub>61</sub>BM/Cu and ITO/PTAA/PFN-Br/MAPbI<sub>3</sub>/PC<sub>61</sub>BM: PMMA/Cu

| <b>PMMA (wt%)</b>   | <b><math>V_{oc}</math> (V)</b> | <b><math>J_{sc}</math> (mA/cm<sup>2</sup>)</b> | <b>FF</b> | <b>PCE (%)</b> |
|---------------------|--------------------------------|------------------------------------------------|-----------|----------------|
| PC <sub>61</sub> BM | 1.068±0.011                    | 19.37±0.19                                     | 0.66±0.01 | 13.15±0.56     |
| 0.25                | 1.077±0.006                    | 19.45±0.36                                     | 0.72±0.02 | 15.74±0.59     |
| 0.5                 | 1.094±0.012                    | 19.47±0.49                                     | 0.74±0.02 | 16.05±0.58     |
| 1.0                 | 1.104±0.012                    | 19.94±0.71                                     | 0.76±0.01 | 16.72±0.728    |
| 2.0                 | 1.113±0.015                    | 18.78±0.69                                     | 0.74±0.02 | 16.02±0.94     |
| 4.0                 | 1.106±0.015                    | 18.94±0.60                                     | 0.71±0.02 | 15.30±1.06     |

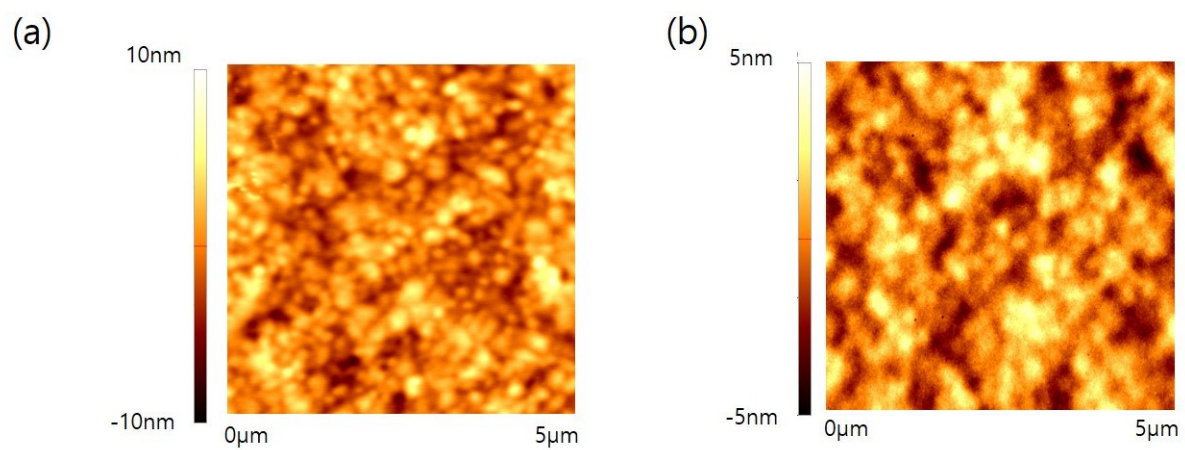

**Fig S3.** – AFM topographic images obtained from the PMMA sides of (a) ITO/PTAA/PFN-Br/MAPbI<sub>3</sub>/PMMA(2 wt.%) and (b) ITO/PTAA/PFN-Br/MAPbI<sub>3</sub>/PMMA(4 wt.%) films.

**Table S3.** – Photovoltaic device parameters for I-PeSCs fabricated using device structures of ITO/PTAA/PFN-Br/MAPbI<sub>3</sub>/PC<sub>61</sub>BM/Cu, ITO/PTAA/PFN-Br/MAPbI<sub>3</sub>/PC<sub>61</sub>BM/BCP/Cu, and ITO/PTAA/PFN-Br/MAPbI<sub>3</sub>/PC<sub>61</sub>BM:PMMA/Cu

| ETL                      | Electrode | Sweep Direction | $V_{oc}$ (V) | $J_{sc}$ (mA/cm <sup>2</sup> ) | FF   | PCE (%)          | IPCE  |
|--------------------------|-----------|-----------------|--------------|--------------------------------|------|------------------|-------|
| PC <sub>61</sub> BM      | Cu        | Forward         | 1.06         | 19.34                          | 0.66 | 13.49<br>(13.08) | 18.7  |
|                          |           | Reverse         | 1.07         | 19.39                          | 0.66 | 13.55<br>(13.20) |       |
| PC <sub>61</sub> BM/BCP  | Cu        | Forward         | 1.09         | 21.25                          | 0.77 | 17.80<br>(17.64) | 21.02 |
|                          |           | Reverse         | 1.09         | 21.12                          | 0.77 | 17.88<br>(17.64) |       |
| PC <sub>61</sub> BM:PMMA | Cu        | Forward         | 1.12         | 20.83                          | 0.78 | 18.21<br>(17.73) | 21.07 |
|                          |           | Reverse         | 1.12         | 20.80                          | 0.79 | 18.38<br>(18.00) |       |

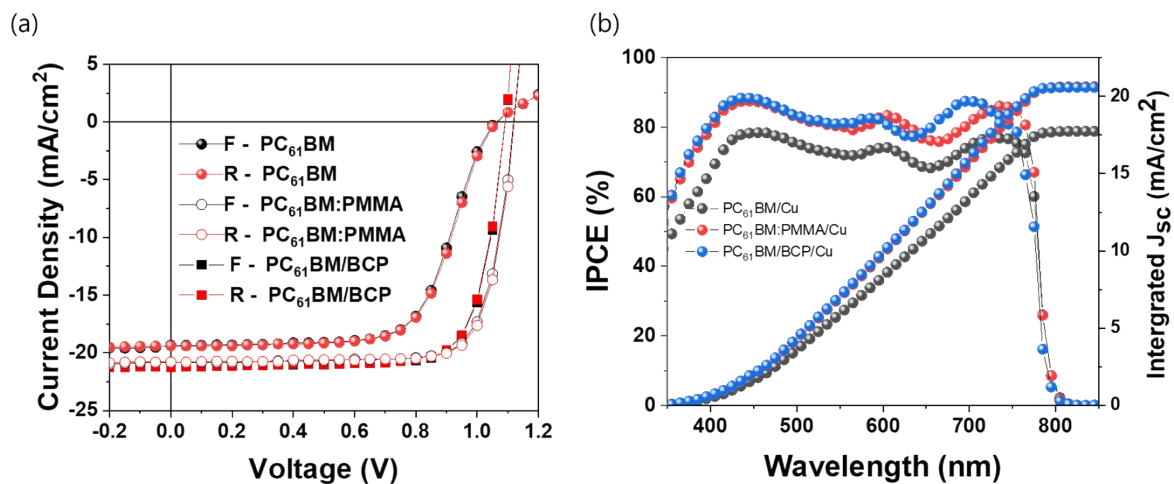

**Fig S4.** – (a)  $J-V$  and (b) IPCE plots for the best performance I-PeSCs fabricated using  $\text{PC}_{61}\text{BM}$ ,  $\text{PC}_{61}\text{BM}/\text{BCP}$ , and  $\text{PC}_{61}\text{BM}:\text{PMMA}$  as ETLs



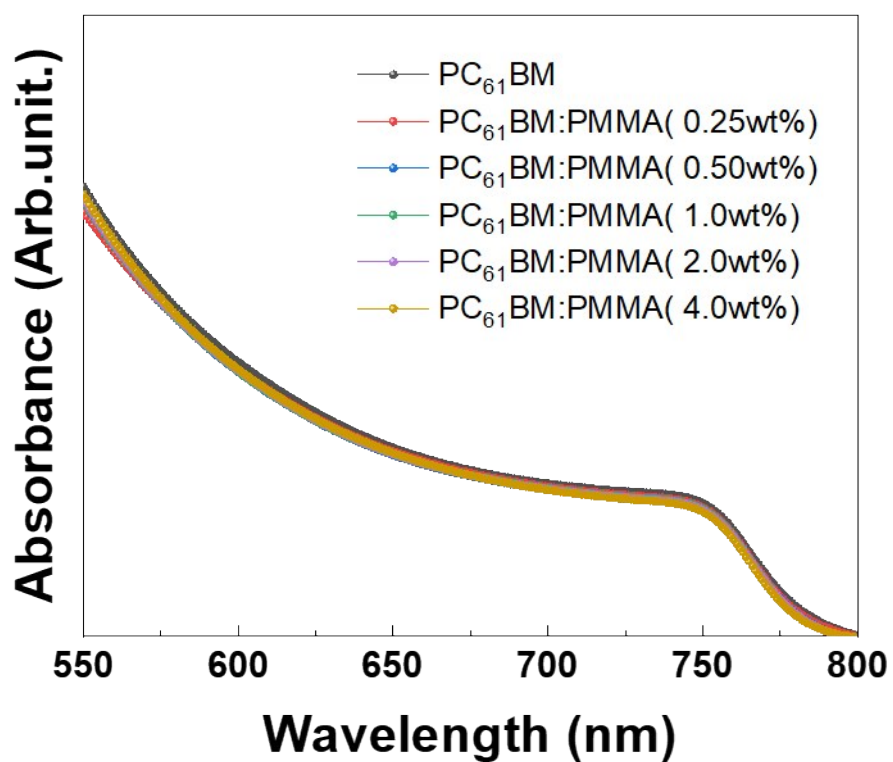

**Fig S5.** – UV-vis absorption spectra for films of ITO/PTAA/PFN-Br/MAPbI<sub>3</sub>/PC<sub>61</sub>BM and ITO/PTAA/PFN-Br/MAPbI<sub>3</sub>/PC<sub>61</sub>BM:PMMA fabricated using various concentrations of PMMA in PC<sub>61</sub>BM

**Table S4.** - Energy levels obtained from ultraviolet photoelectron spectra (UPS) for Cu electrode with PC<sub>61</sub>BM and PC<sub>61</sub>BM:PMMA

| <b>Sample</b>               | <b>E<sub>cut-off</sub> (eV)</b> | <b>IE- (hν - E<sub>cut-off</sub>)</b> | <b>E<sub>v</sub>(eV)</b> | <b>hν - E<sub>cut-off</sub> (eV)</b> |
|-----------------------------|---------------------------------|---------------------------------------|--------------------------|--------------------------------------|
| Cu/PC <sub>61</sub> BM      | 16.22                           | 0.79                                  | 5.77                     | 4.98                                 |
| Cu/PC <sub>61</sub> BM:PMMA | 17.08                           | 1.92                                  | 6.04                     | 4.12                                 |

**Table S5.** – Parameters obtained from measurement of impedances in I-PeSCs fabricated using PC<sub>61</sub>BM and PC<sub>61</sub>BM:PMMA as ETLs

| ETL                      | R <sub>p</sub> (Ω) | R <sub>s</sub> (Ω) | CPE.  |
|--------------------------|--------------------|--------------------|-------|
| PC <sub>61</sub> BM      | 273.43             | 26.93              | 0.801 |
| PC <sub>61</sub> BM:PMMA | 44.10              | 24.21              | 0.914 |

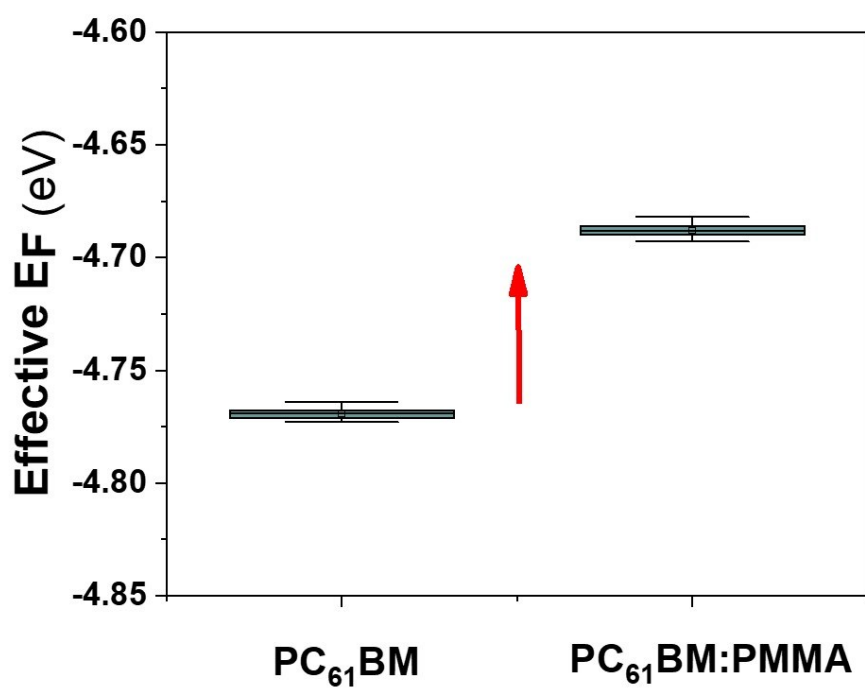

**Fig S6.** – Energy levels characterized by measurement of Kelvin probe for films of ITO/PC<sub>61</sub>BM and ITO/PC<sub>61</sub>BM:PMMA

**Table S6.** – Trap density ( $N_{\text{trap-density}}$ ) and mobility ( $\alpha$ ) calculated from the data plots for electron-only devices fabricated using the structures of  $C_{60}/\text{MAPbI}_3/\text{PC}_{61}\text{BM}/\text{Cu}$  and  $C_{60}/\text{MAPbI}_3/\text{PC}_{61}\text{BM:PMMA}/\text{Cu}$ . The trap-filled-limit voltages ( $V_{\text{TFL}}$ ) for the electron-only devices fabricated using PCBM and  $\text{PC}_{61}\text{BM:PMMA}$  as ETLs are 1.025 eV and 0.8 eV, respectively. The entire trap density ( $N_{\text{trap-density}}$ ) in the  $\text{MAPbI}_3$  layers is calculated by using

the equation  $N_{\text{trap-density}} = \frac{2\varepsilon_r\varepsilon_0V_{\text{TFL}}}{ed^2}$ , where  $\varepsilon_r$  is the dielectric constant of  $\text{MAPbI}_3$ ,  $\varepsilon_0$  is the vacuum permittivity ( $8.85 \times 10^{-14} \text{ Fcm}^{-1}$ ),  $e$  is the charge constant ( $1.69 \times 10^{-19} \text{ C}$ ), and  $d$  is the thickness of the  $\text{MAPbI}_3$  layer, respectively

| ETL                            | $N_{\text{Trap Density}} (\text{cm}^{-3})$ | $\alpha (\text{cm}^2\text{V}^{-1}\text{s}^{-1})$ |
|--------------------------------|--------------------------------------------|--------------------------------------------------|
|                                | Electron                                   |                                                  |
| $\text{PC}_{61}\text{BM}$      | $5.41 \times 10^{15}$                      | $7.75 \times 10^{-2}$                            |
| $\text{PC}_{61}\text{BM:PMMA}$ | $3.54 \times 10^{15}$                      | $7.86 \times 10^{-2}$                            |

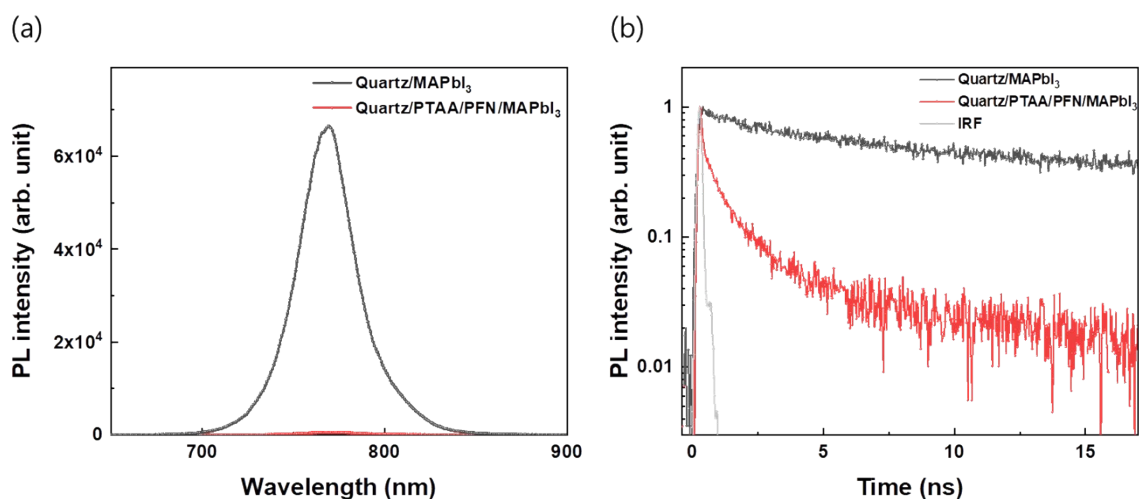

**Fig S7.** (a) Steady-state PL spectra and (b) TRPL decays of films of quartz/MAPbI<sub>3</sub> and quartz/PTAA/PFN-Br/MAPbI<sub>3</sub>. The PL intensity of the perovskite was quenched by 99.5% in the quartz/PTAA/PFN-Br/MAPbI<sub>3</sub> film. In the TRPL, an excitation and detection wavelength of 470 nm and 770 nm was used. IRF represents instrument response function of the TCSPC system. The PL and TRPL data were obtained by photoexciting the quartz side of the films for observing the hole transfer process at the perovskite and HTL interface. Based on fitting the data with the use of bi-exponential functions, we obtained decay-time constants of 0.3 ns (99 %) and 1.3 ns (1 %) in the quartz/PTAA/PFN-Br/MAPbI<sub>3</sub> film

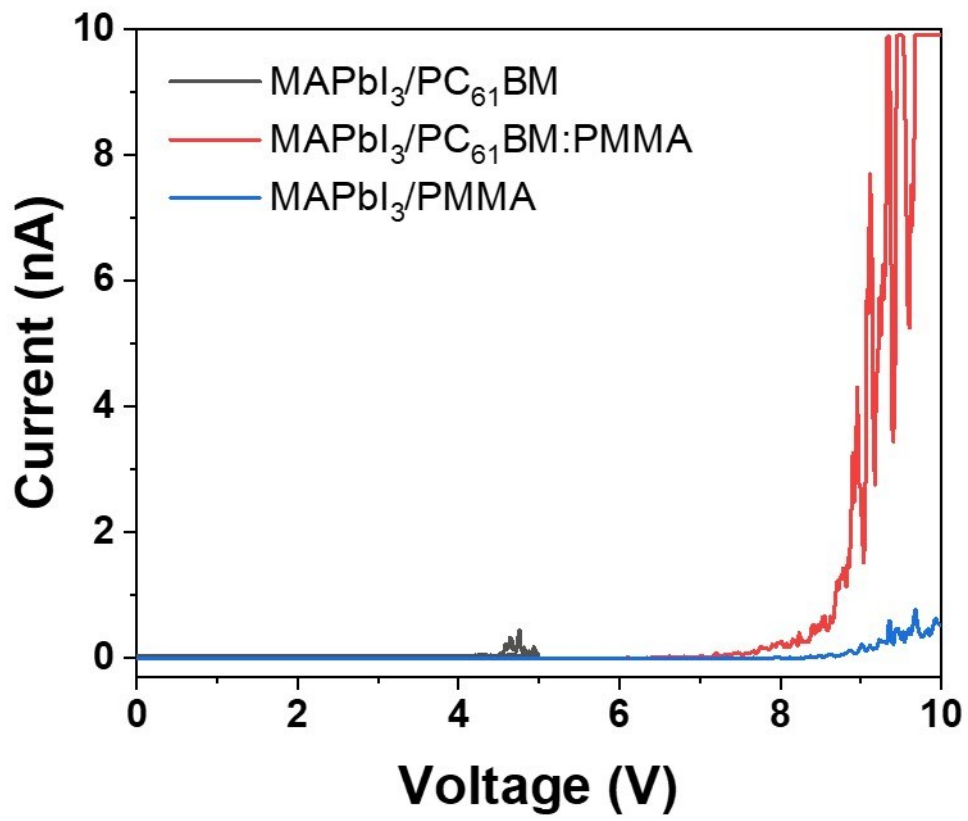

**Fig S8.** - Mean IV profiles extracted from several points of AFM topographic images in Fig. S2 (c) to (e)

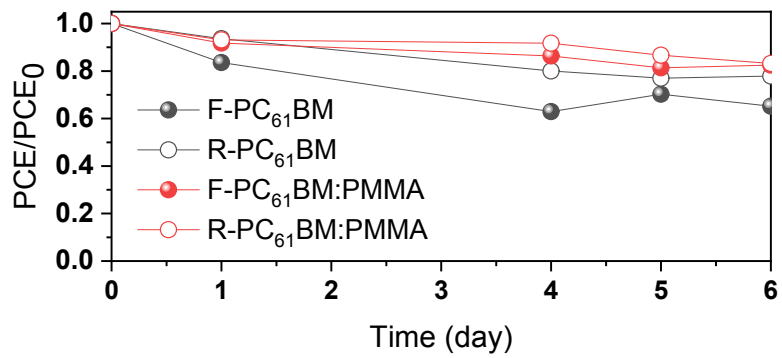

**Fig S9.** - Stability measurement for I-PeSCs plotted as a function of storage time under ambient air at 25 °C with a relative humidity of 20~45% for the active area of 1 cm<sup>2</sup>
